# Supplementary material
Source: publisher figshare collection journal article supplement (https://acs.figshare.com/ndownloader/files/3993964)
Supplement: Supplementary file 1 [file 3993964]

## Electronic supporting information

# Enhanced hydrolytic degradation of heterografted polyglycidols: Phosphonoethylated monoester – and polycaprolactone grafts

*Jens Köhler,<sup>a</sup> Fabian Marquardt,<sup>a</sup> Michael Teske,<sup>b</sup> Helmut Keul,<sup>a,\*</sup> Katrin Sternberg<sup>b,\*</sup> and  
Martin Möller<sup>a,\*</sup>*

<sup>a</sup> Institute of Technical and Macromolecular Chemistry, RWTH Aachen University and  
Interactive Materials Research - DWI at RWTH Aachen e.V., Forckenbeckstr. 50, D-52056  
Aachen, Germany.

<sup>b</sup> Institute for Biomedical Engineering, University of Rostock, Friedrich-Barnewitz-Straße 4,  
D-18119 Rostock, Germany

\* Correspondence to:

H. Keul, Email: keul@dwf.rwth-aachen.de

K. Sternberg, Email: katrin.sternberg@uni-rostock.de

M. Möller, Email: moeller@dwf.rwth-aachen.de

## Synthesis of polyglycidol, PG<sub>26</sub> (2)

**Table S1.** Ratio of monomer to initiator adjusted in the feed, degree of polymerization ( $P_n$ ) and molecular weight ( $M_n$ ) determined by end group analysis ( $^1\text{H}$  NMR) and SEC data of linear P(EEGE)<sub>26</sub> (1) and PG<sub>26</sub> (2).

| Polymer                   | [EEGE]/[3-PP] <sup>a</sup> | $P_n$ , NMR <sup>b</sup> | $M_n$ , NMR <sup>b</sup><br>(g/mol) | $M_n$ , SEC <sup>c</sup><br>(g/mol) | $M_w/M_n$ <sup>c</sup> | Yield /<br>% |
|---------------------------|----------------------------|--------------------------|-------------------------------------|-------------------------------------|------------------------|--------------|
| P(EEGE) <sub>26</sub> (1) | 24                         | 26                       | 3801                                | 2900                                | 1.2                    | 100          |
| PG <sub>26</sub> (2)      | ---                        | 26                       | 1926                                | 2500                                | 1.2                    | 78           |

<sup>a</sup> Ratio of ethoxy ethyl glycidyl ether (EEGE) to 3-phenyl-1-propanol (3-PP), which was used as initiator. <sup>b</sup> Degree of polymerization ( $P_n$ ) and molecular weight ( $M_n$ , NMR) calculated from  $^1\text{H}$  NMR. The accuracy of integration in  $^1\text{H}$  NMR spectra is  $\pm 5\%$ . <sup>c</sup> Number average molecular weight ( $M_n$ , SEC) and molecular weight distribution ( $M_w/M_n$ ) determined by size exclusion chromatography (SEC) in THF as eluent for P(EEGE) (1) and DMF as eluent for PG (2). Narrow distributed poly(methyl methacrylate) standards were used for calibration.

## Synthesis of P(G<sup>DEPE</sup><sub>x-co</sub>-G<sub>y</sub>)

**Table S2.** Synthesis of P(G<sup>DEPE</sup><sub>x-co</sub>-G<sub>y</sub>) (3a-c) (t = 66 h, T = rt): Reagent ratios and yields.

| Polymer                                                      | PG <sub>26</sub> (2) /<br>g, (mmol OH) | KO <sup>t</sup> Bu / <sup>a</sup><br>mL, (mmol) | DEVP /<br>g, (mmol) | [DEVP]/[OH]<br>x, (%) <sup>b</sup> | Yield / <sup>c</sup><br>% |
|--------------------------------------------------------------|----------------------------------------|-------------------------------------------------|---------------------|------------------------------------|---------------------------|
| P(G <sup>DEPE</sup> <sub>4-co</sub> -G <sub>22</sub> ) (3a)  | 4.812, (64.957)                        | 0.81, (0.81)                                    | 2.050, (12.490)     | 5, (19)                            | 86                        |
| P(G <sup>DEPE</sup> <sub>10-co</sub> -G <sub>16</sub> ) (3b) | 4.866, (65.686)                        | 1.64, (1.64)                                    | 4.147, (25.265)     | 10, (38)                           | 81                        |
| P(G <sup>DEPE</sup> <sub>9-co</sub> -G <sub>17</sub> ) (3c)  | 4.233, (57.143)                        | 1.43, (1.43)                                    | 3.607, (21.975)     | 10, (38)                           | 91                        |

<sup>a</sup> 1 M solution in THF. 6.5 mol% relative to the amount of DEVP. <sup>b</sup> Molar ratio of DEVP to hydroxyl groups of PG, which was adjusted in the feed. <sup>c</sup> Yield after purification by precipitation in cold pentane.

## SEC analysis of the macroinitiators (2), (3a), (3b) and (3c)

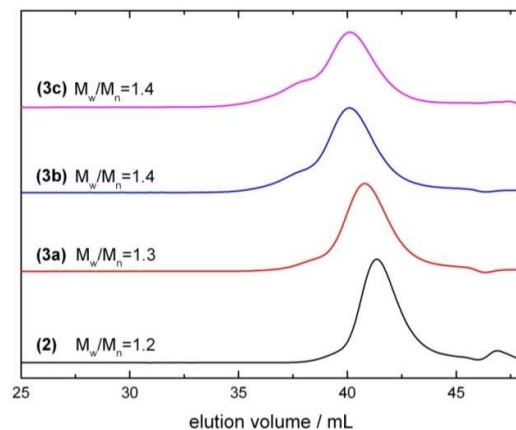

**Figure S1.** SEC analysis of the macroinitiators: DMF-SEC traces of PG<sub>26</sub> (**2**), P(G<sup>DEPE</sup><sub>4-co-G<sub>22</sub></sub>) (**3a**), P(G<sup>DEPE</sup><sub>10-co-G<sub>16</sub></sub>) (**3b**) and P(G<sup>DEPE</sup><sub>9-co-G<sub>17</sub></sub>) (**3c**).

## Chemical catalyzed grafting of $\epsilon$ CL

### <sup>31</sup>P NMR analysis of the graft copolymers – Inertness of phosphonate groups

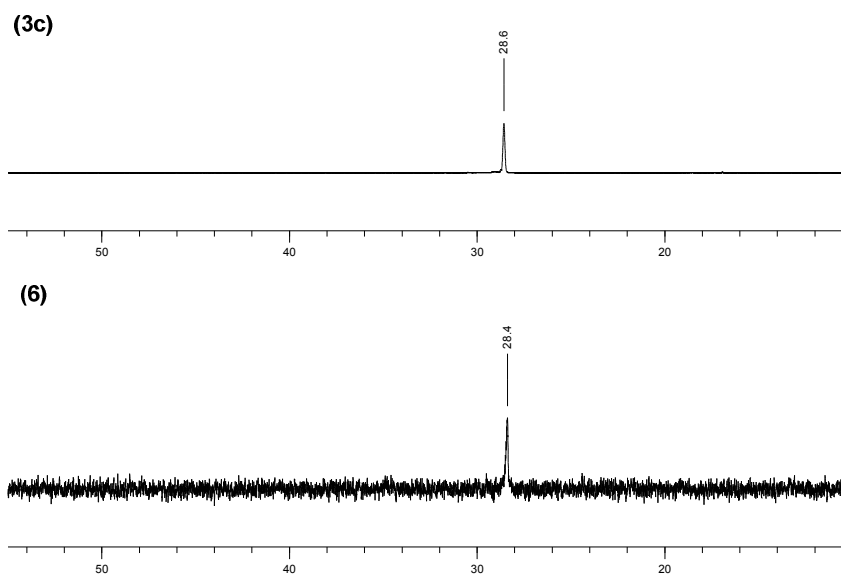

**Figure S2.** <sup>31</sup>P NMR spectra of P(G<sup>DEPE</sup><sub>9-co-G<sub>17</sub></sub>) (**3c**) in DMSO-*d*<sub>6</sub> and P(G<sup>DEPE</sup><sub>9-co-(G-g- $\epsilon$ CL<sub>33</sub>)<sub>17</sub></sub>) (**6**) in CDCl<sub>3</sub>.

## SEC traces of 4a and 5a prepared by chemical catalysis

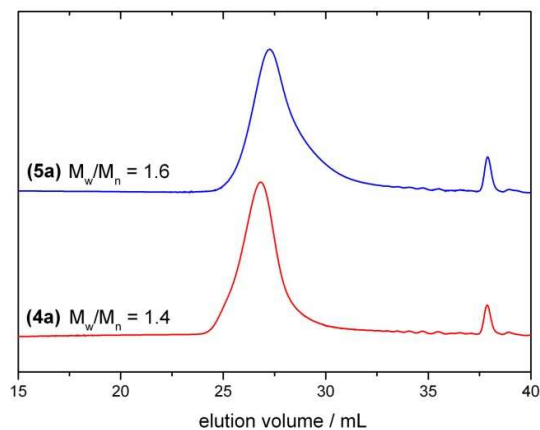

**Figure S3.** THF-SEC of  $P(G^{DEPE}_{4-co-(G-g-\epsilon CL_8)_{14-co-G_8}}$  (**4a**) and  $P(G^{DEPE}_{10-co-(G-g-\epsilon CL_6)_{10-co-G_6}}$  (**5a**).

## Monodealkylation of phosphonate functionalized graft copolymers

$^{31}P$  spectra of DEPE and EPE containing polyglycidols (**3a**) and (**7a**)

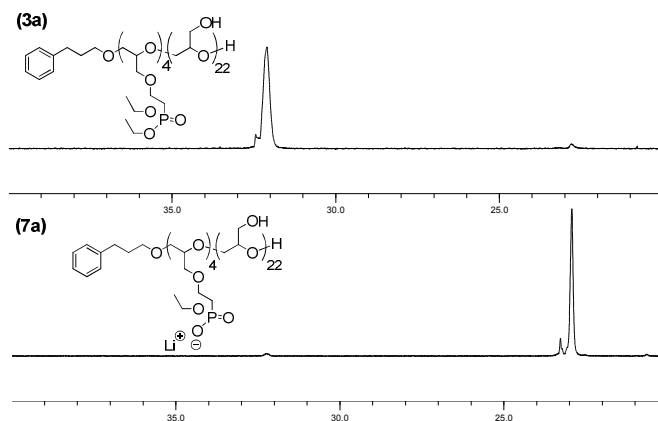

**Figure S4.**  $^{31}P$  NMR spectra of  $P(G^{DEPE}_{4-co-G_{22}})$  (**3a**) (*top*) and  $P(G^{EPE}_{4-co-G_{22}})$  (**7a**) (*bottom*) recorded in  $D_2O$ .

**$^{31}\text{P}$  NMR spectra of DEPE and EPE containing graft copolymers (5b) and (8b)**

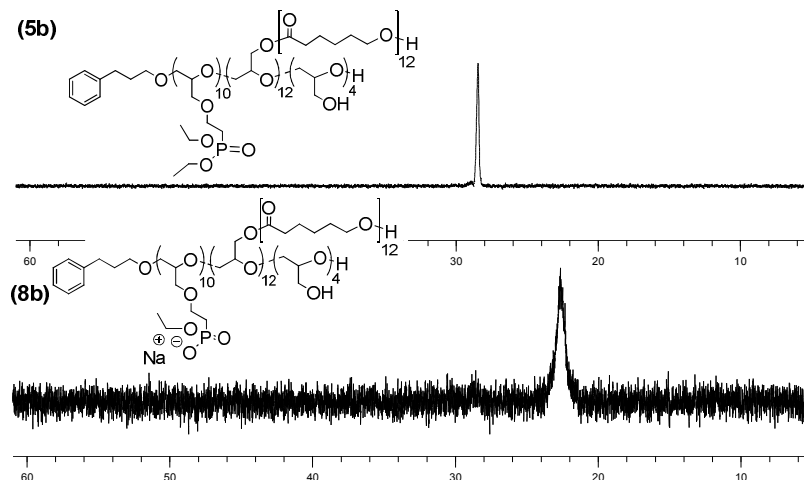

**Figure S5.**  $^{31}\text{P}$  NMR spectra of  $\text{P}(\text{G}^{\text{DEPE}}_{10\text{-co}}(\text{G-g-}\epsilon\text{CL}_{12})_{12\text{-co}}\text{-G}_4)$  (**5b**) (top) and  $\text{P}(\text{G}^{\text{EPE}}_{10\text{-co}}(\text{G-g-}\epsilon\text{CL}_{12})_{12\text{-co}}\text{-G}_4)$  (**8b**) (bottom) recorded in  $\text{CDCl}_3$ .

**SEC analysis of  $\text{P}(\text{G}^{\text{DEPE}}_{10\text{-co}}(\text{G-g-}\epsilon\text{CL}_{11})_{12\text{-co}}\text{-G}_4)$  (**5b**),  $\text{P}(\text{G}^{\text{DEPE}}_{2\text{-co}}\text{-G}^{\text{EPE}}_{8\text{-co}}(\text{G-g-}\epsilon\text{CL}_{11})_{12\text{-co}}\text{-G}_4)$  (**8a**) and  $\text{P}(\text{G}^{\text{EPE}}_{10\text{-co}}(\text{G-g-}\epsilon\text{CL}_{11})_{12\text{-co}}\text{-G}_4)$  (**8b**)**

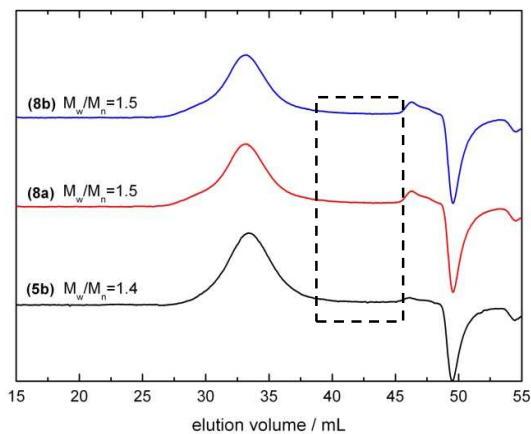

**Figure S6.** DMF-SEC traces of  $\text{P}(\text{G}^{\text{DEPE}}_{10\text{-co}}(\text{G-g-}\epsilon\text{CL}_{12})_{12\text{-co}}\text{-G}_4)$  (**5b**) and  $\text{P}(\text{G}^{\text{DEPE}}_{2\text{-co}}\text{-G}^{\text{EPE}}_{8\text{-co}}(\text{G-g-}\epsilon\text{CL}_{12})_{12\text{-co}}\text{-G}_4)$  (**8a**) and  $\text{P}(\text{G}^{\text{EPE}}_{10\text{-co}}(\text{G-g-}\epsilon\text{CL}_{12})_{12\text{-co}}\text{-G}_4)$  (**8b**) measured with DMF as eluent and narrow distributed poly(methyl methacrylate) standards.

### $^{31}\text{P}$ NMR spectra of prototype copolymers (6) and (9)

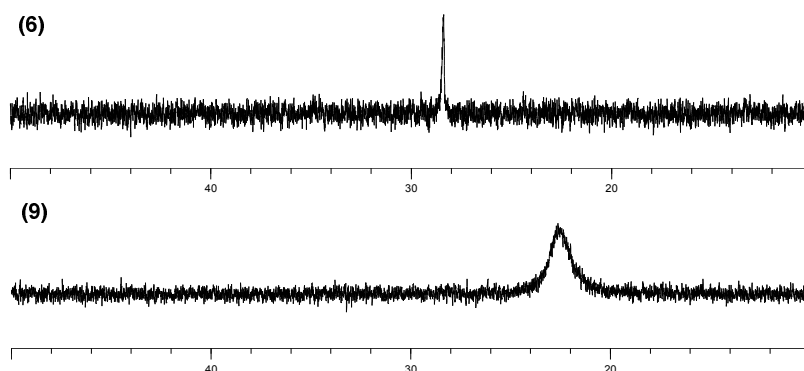

**Figure S7.**  $^{31}\text{P}$  NMR spectra of  $\text{P}(\text{G}^{\text{DEPE}}_9\text{-co-(G-g-}\epsilon\text{CL}_{33})_{17})$  (6) (top) and  $\text{P}(\text{G}^{\text{EPE}}_{10}\text{-co-(G-g-}\epsilon\text{CL}_{33})_{17})$  (9) (bottom) recorded in  $\text{CDCl}_3$ .

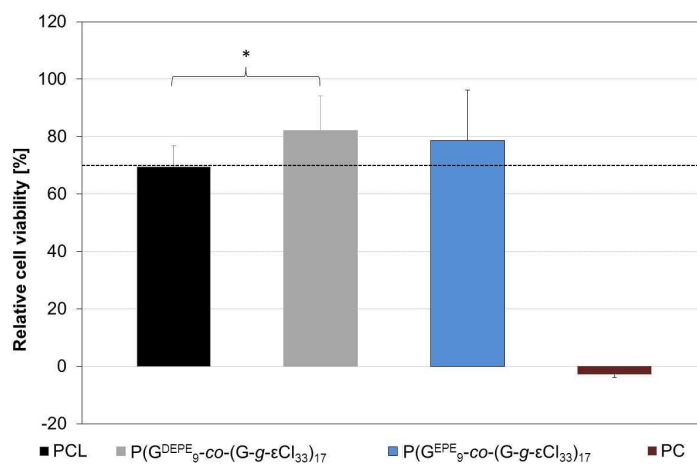

**Figure S8.** Relative viability of L929 fibroblasts grown on PCL, copolymer 6 and 9. Data are presented as mean $\pm$ SD, n = 8.

### SEC traces of PCL reference after 0, 63 and 147 days

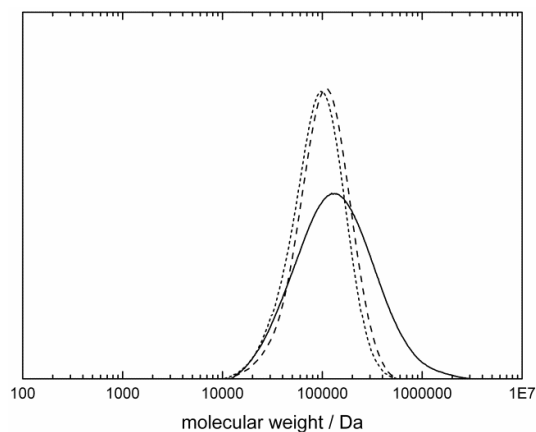

**Figure S9.** Molecular weight distribution of PCL in Sørensen buffer (0.1 M, pH 7.4) at 55 °C after 0 (—), 63 (···) and 147 (---) days.

**DSC analysis of 6 and 9 after 0, 63 and 147 days of degradation**

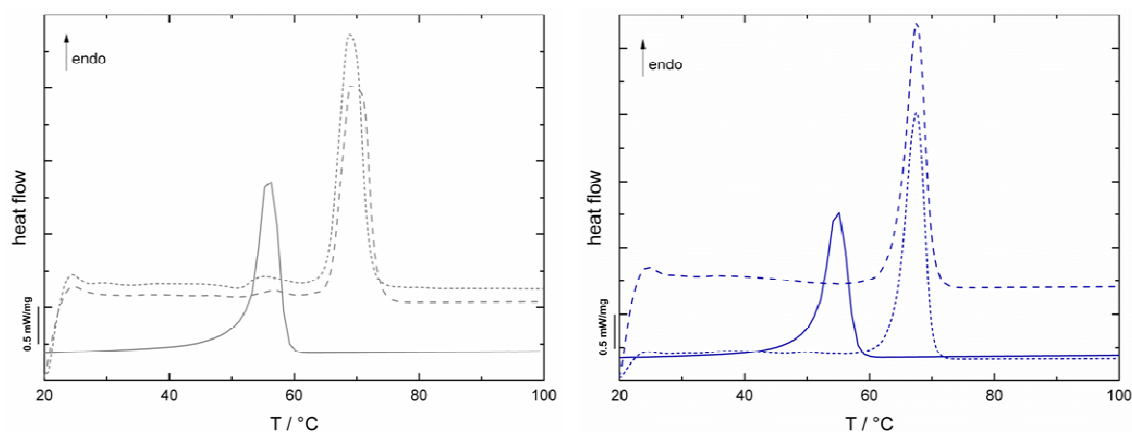

**Figure S10.** DSC first heating curves of P(G<sup>DEPE</sup><sub>9-co-(G-g-εCL<sub>33</sub>)<sub>17</sub></sub> (**6**) (*left*), P(G<sup>EPE</sup><sub>9-co-(G-g-εCL<sub>33</sub>)<sub>17</sub></sub> (**9**) (*right*) after 63 (···) and 147 (---) days in comparison to the second heating curve after 0 days (—) measured at a heating rate of 10 K/min.

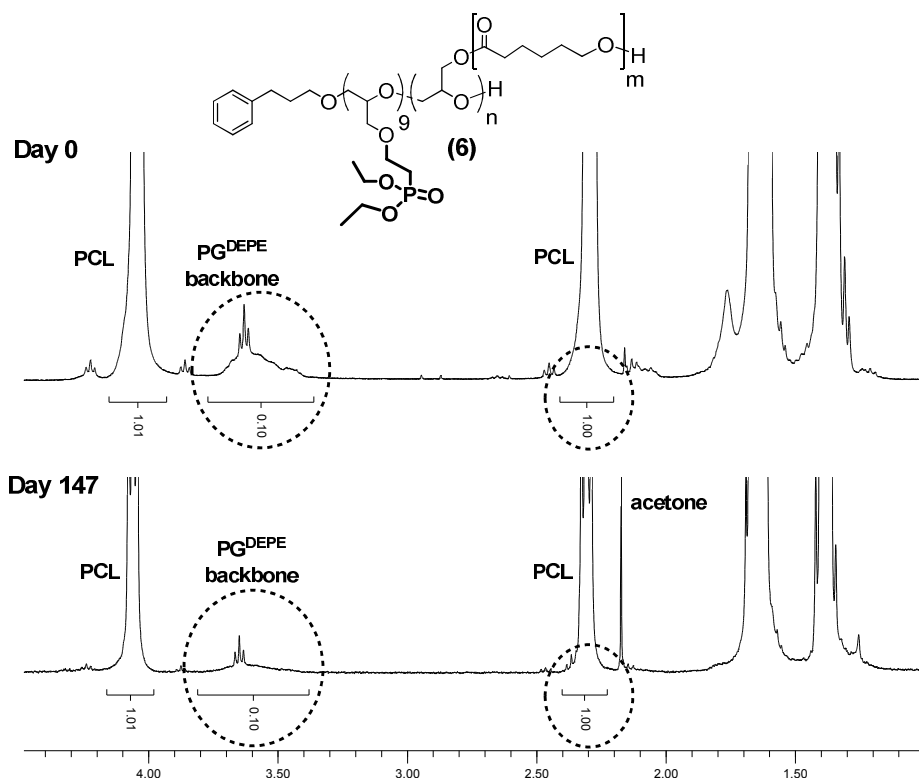

**Figure S11.**  $^1\text{H}$  NMR spectrum of **6** after 0 days and 147 days of degradation (measured in  $\text{CDCl}_3$ ).

The ratio of PCL-grafts to PG<sup>DEPE</sup> backbone remains constant during the degradation study:  
 $[\text{PCL}]/[\text{PG}^{\text{DEPE}} \text{ backbone}] = 1.00/0.10$  after 0 days and 147 days, respectively.



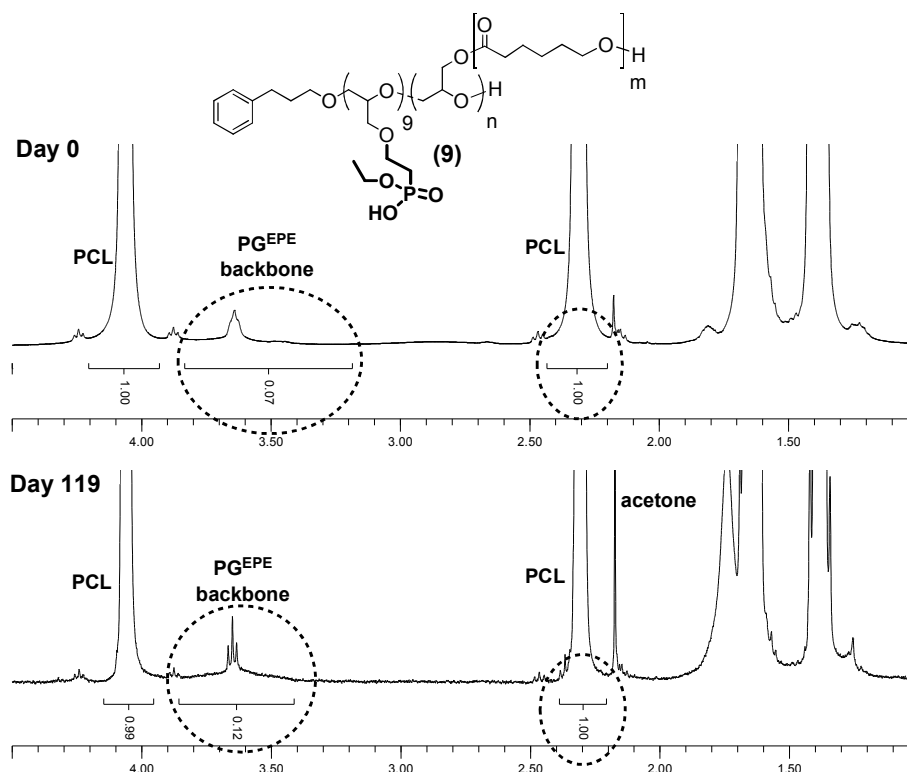

**Figure S12.**  $^1\text{H}$  NMR spectrum of **9** after 0 days and 119 days of degradation (measured in  $\text{CDCl}_3$ ). The ratio of PCL-grafts to PG<sup>DEPE</sup> backbone decreases.

The ratio of PCL-grafts to PG<sup>EPE</sup> backbone changes during the degradation study:  
 $[\text{PCL}]/[\text{PG}^{\text{EPE}} \text{ backbone}] = 1.00/0.07$  (0 days) and  $1.00/0.12$  (119 days).

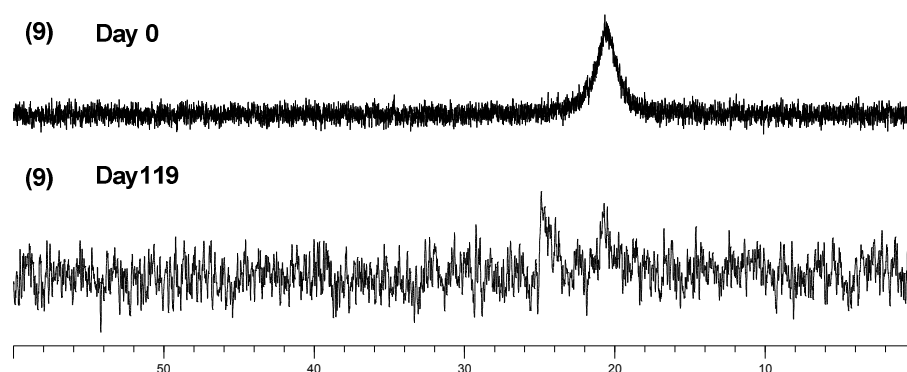

**Figure S13.**  $^{31}\text{P}$  NMR spectrum of copolymer **9** after 0 days and 119 days of degradation (measured in  $\text{DMSO}-d_6$ ).
